# Supplementary material for: MoS2 nanosheet mediated ZnO–g-C3N4 nanocomposite as a peroxidase mimic: catalytic activity and application in the colorimetric determination of Hg(ii)
Source: Royal Society of Chemistry journal article supplement (doi:10.1039/c8ra09814j), 2019-01-01
Supplement: c8ra09814j1.pdf [file c8ra09814j1.pdf]

## Supplementary Materials

### **MoS<sub>2</sub> Nanosheets Mediated ZnO-g-C<sub>3</sub>N<sub>4</sub> Nanocomposite as a Peroxidase Mimics Catalytic Activity and its Application to the Colorimetric Determination of Hg (II) Sensor**

A. Anand Babu Christus<sup>1</sup>, P. Panneerselvam<sup>2\*</sup>, A.Ravikumar<sup>2</sup>, M. Marieeswaran<sup>2</sup>,  
S. Sivanesan<sup>3</sup>

<sup>1</sup>Department of Chemistry, SRM Institute of Science and Technology, Ramapuram campus,  
Ramapuram- 600 089, Tamil Nadu, India.

<sup>2</sup>Department of Chemistry, SRM Institute of Science and Technology, Kattankulathur- 603 203,  
Tamil Nadu, India.

<sup>3</sup>Department of Applied Science and Technology, A. C. Tech Campus, Anna University,  
Chennai-600 025

Corresponding address and Email address: [panneerselvam.pe@ktr.srmuniv.ac.in](mailto:panneerselvam.pe@ktr.srmuniv.ac.in),  
[panneerchem82@gmail.com](mailto:panneerchem82@gmail.com)

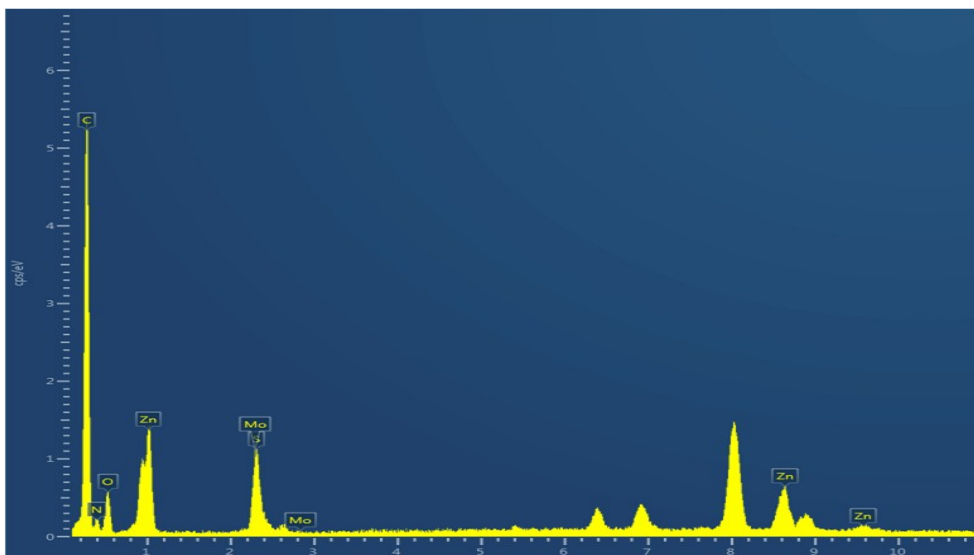

Fig S1 EDX spectrum of ZnO-g-C<sub>3</sub>N<sub>4</sub>/MoS<sub>2</sub> nanocomposite

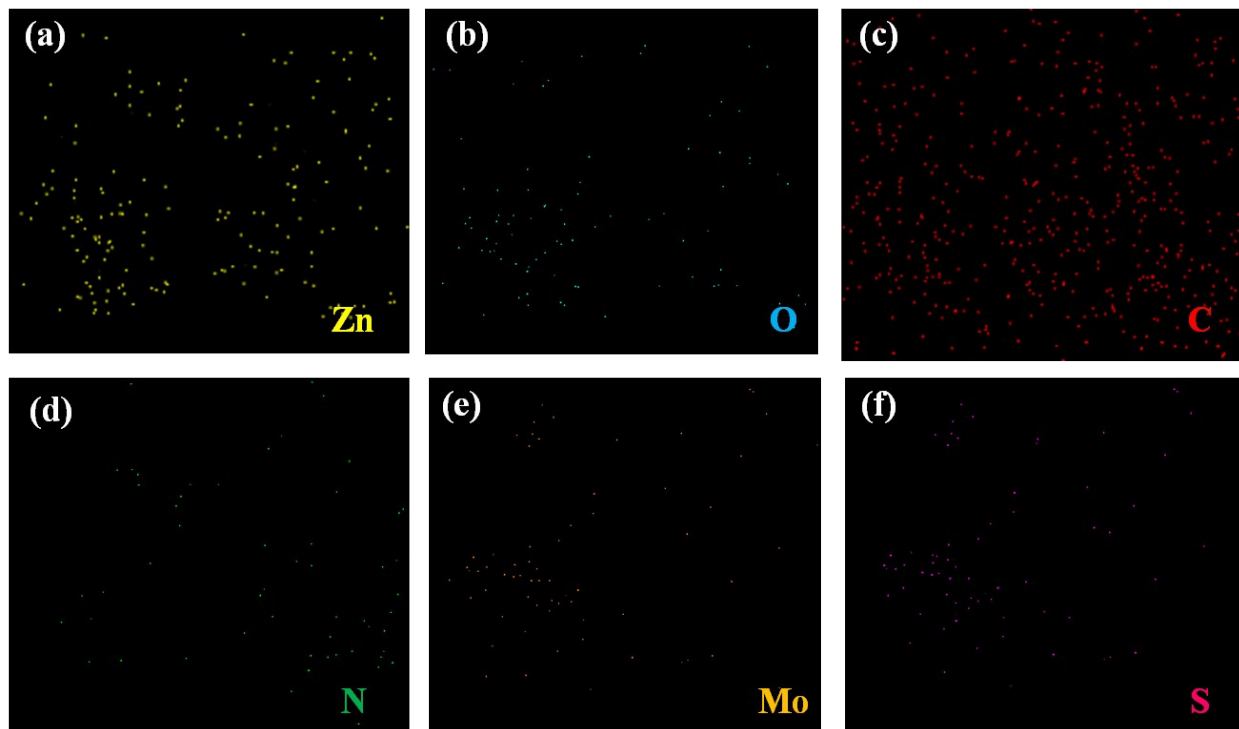

Fig. S2: EDS mapping analysis of the ZnO-g-C<sub>3</sub>N<sub>4</sub>/MoS<sub>2</sub> nanocomposite containing Zn(a), O(b), C (c), N (d), Mo (e), and S (f).

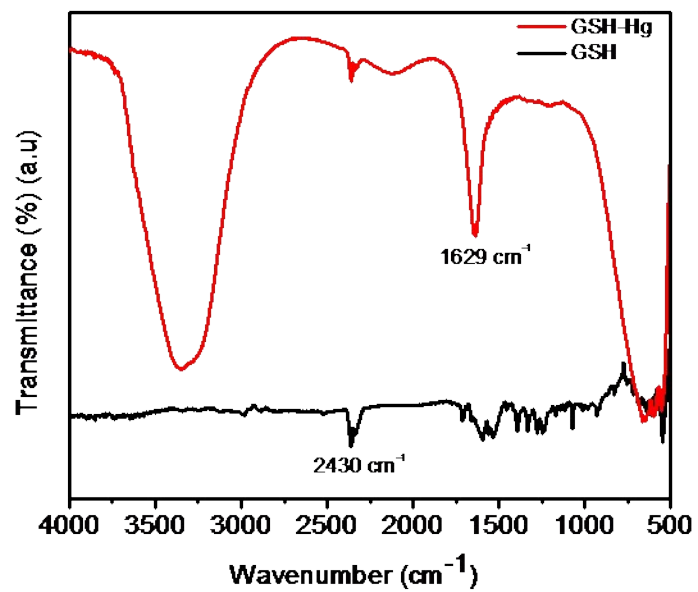

Fig. S3 FT-IR spectra of pure GSH and GSH-Hg
